# Supplementary material
Source: PubMed Central journal article supplement (PMC4936030)

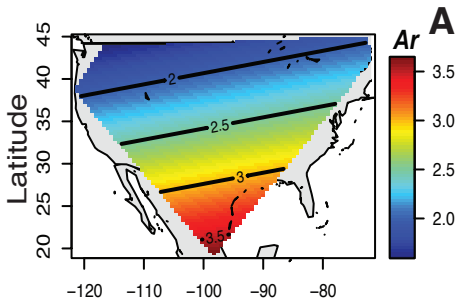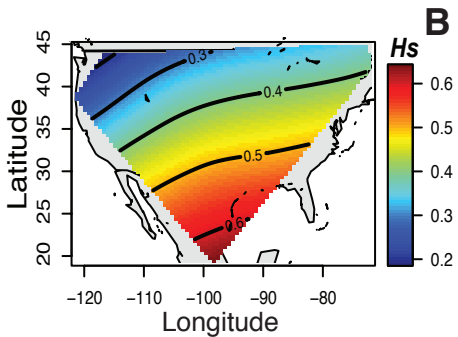

Supplement: rspb20160443supp1.pdf [file rspb20160443supp1.pdf]

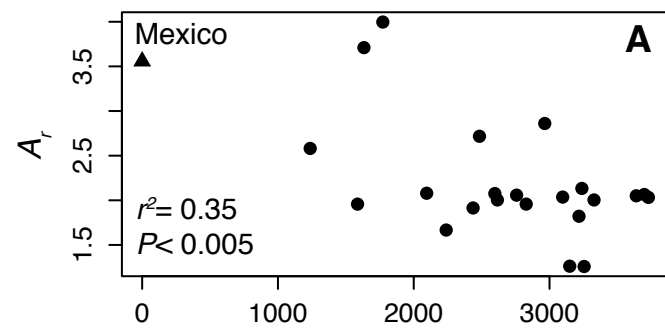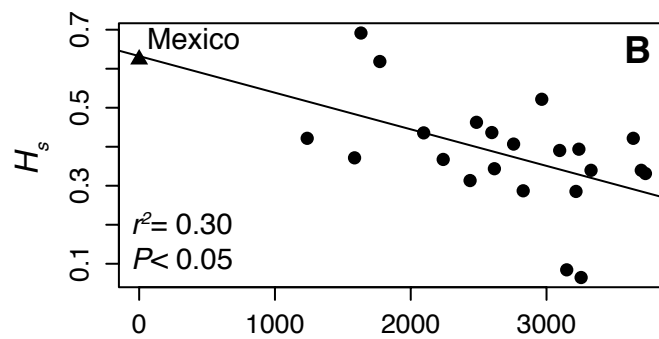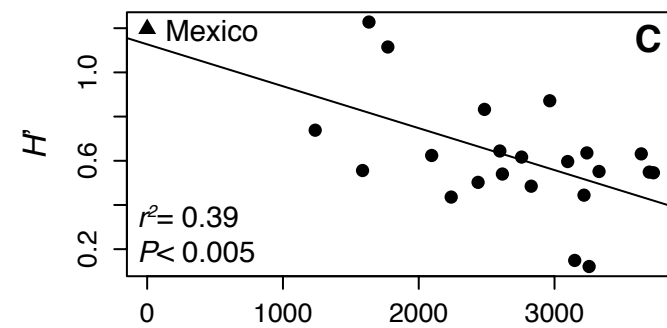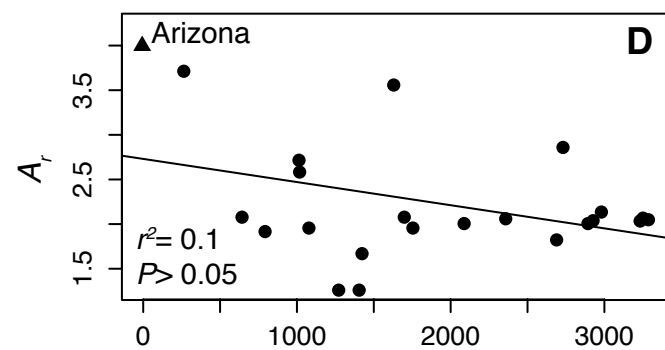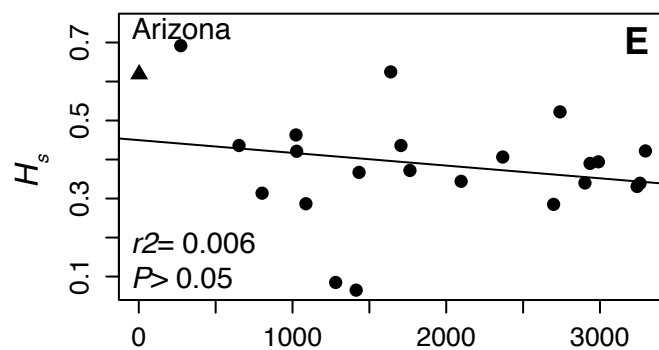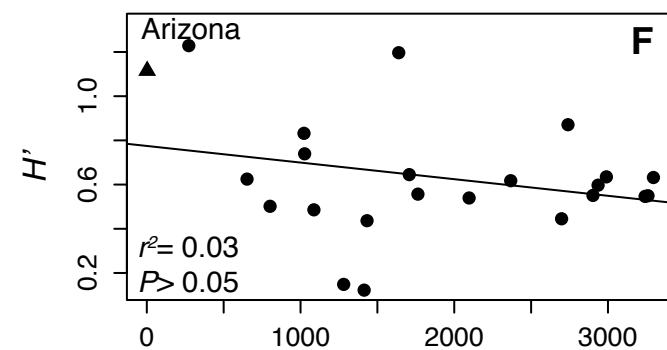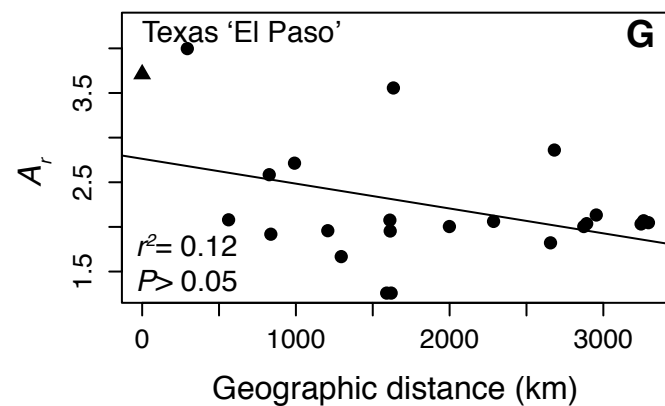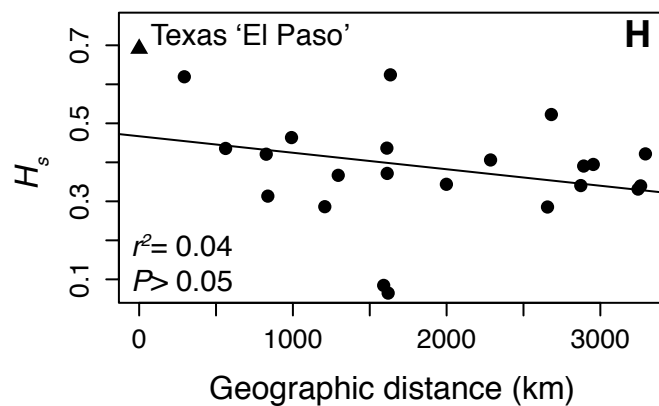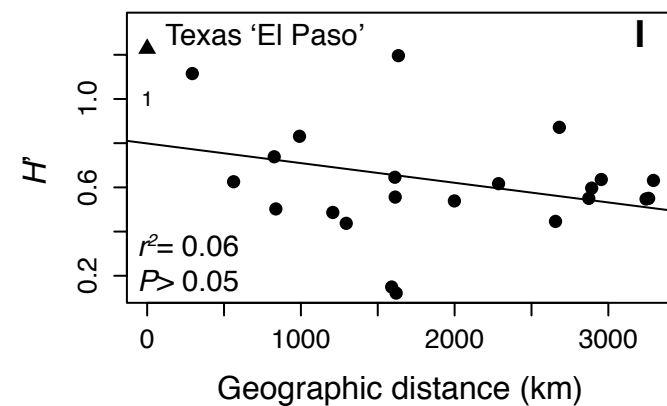

Supplement: rspb20160443supp2.pdf [file rspb20160443supp2.pdf]

**A**

Populations from ancestral range (n= 8)

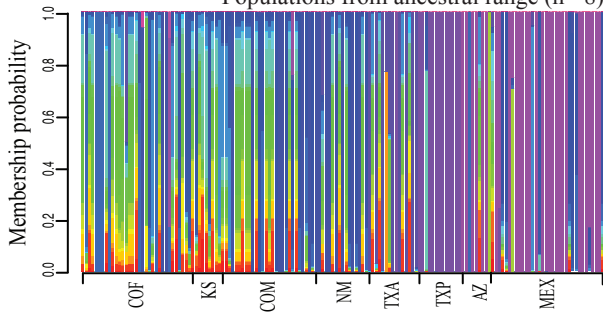**B**

Populations from the East (n= 11)

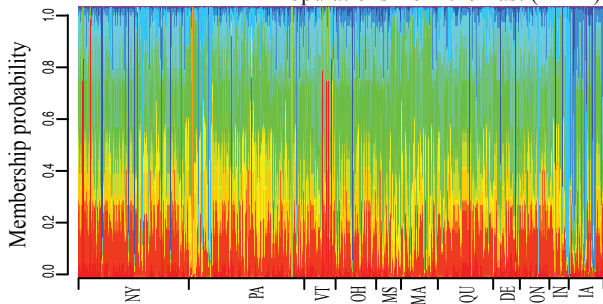

Supplement: rspb20160443supp3.pdf [file rspb20160443supp3.pdf]

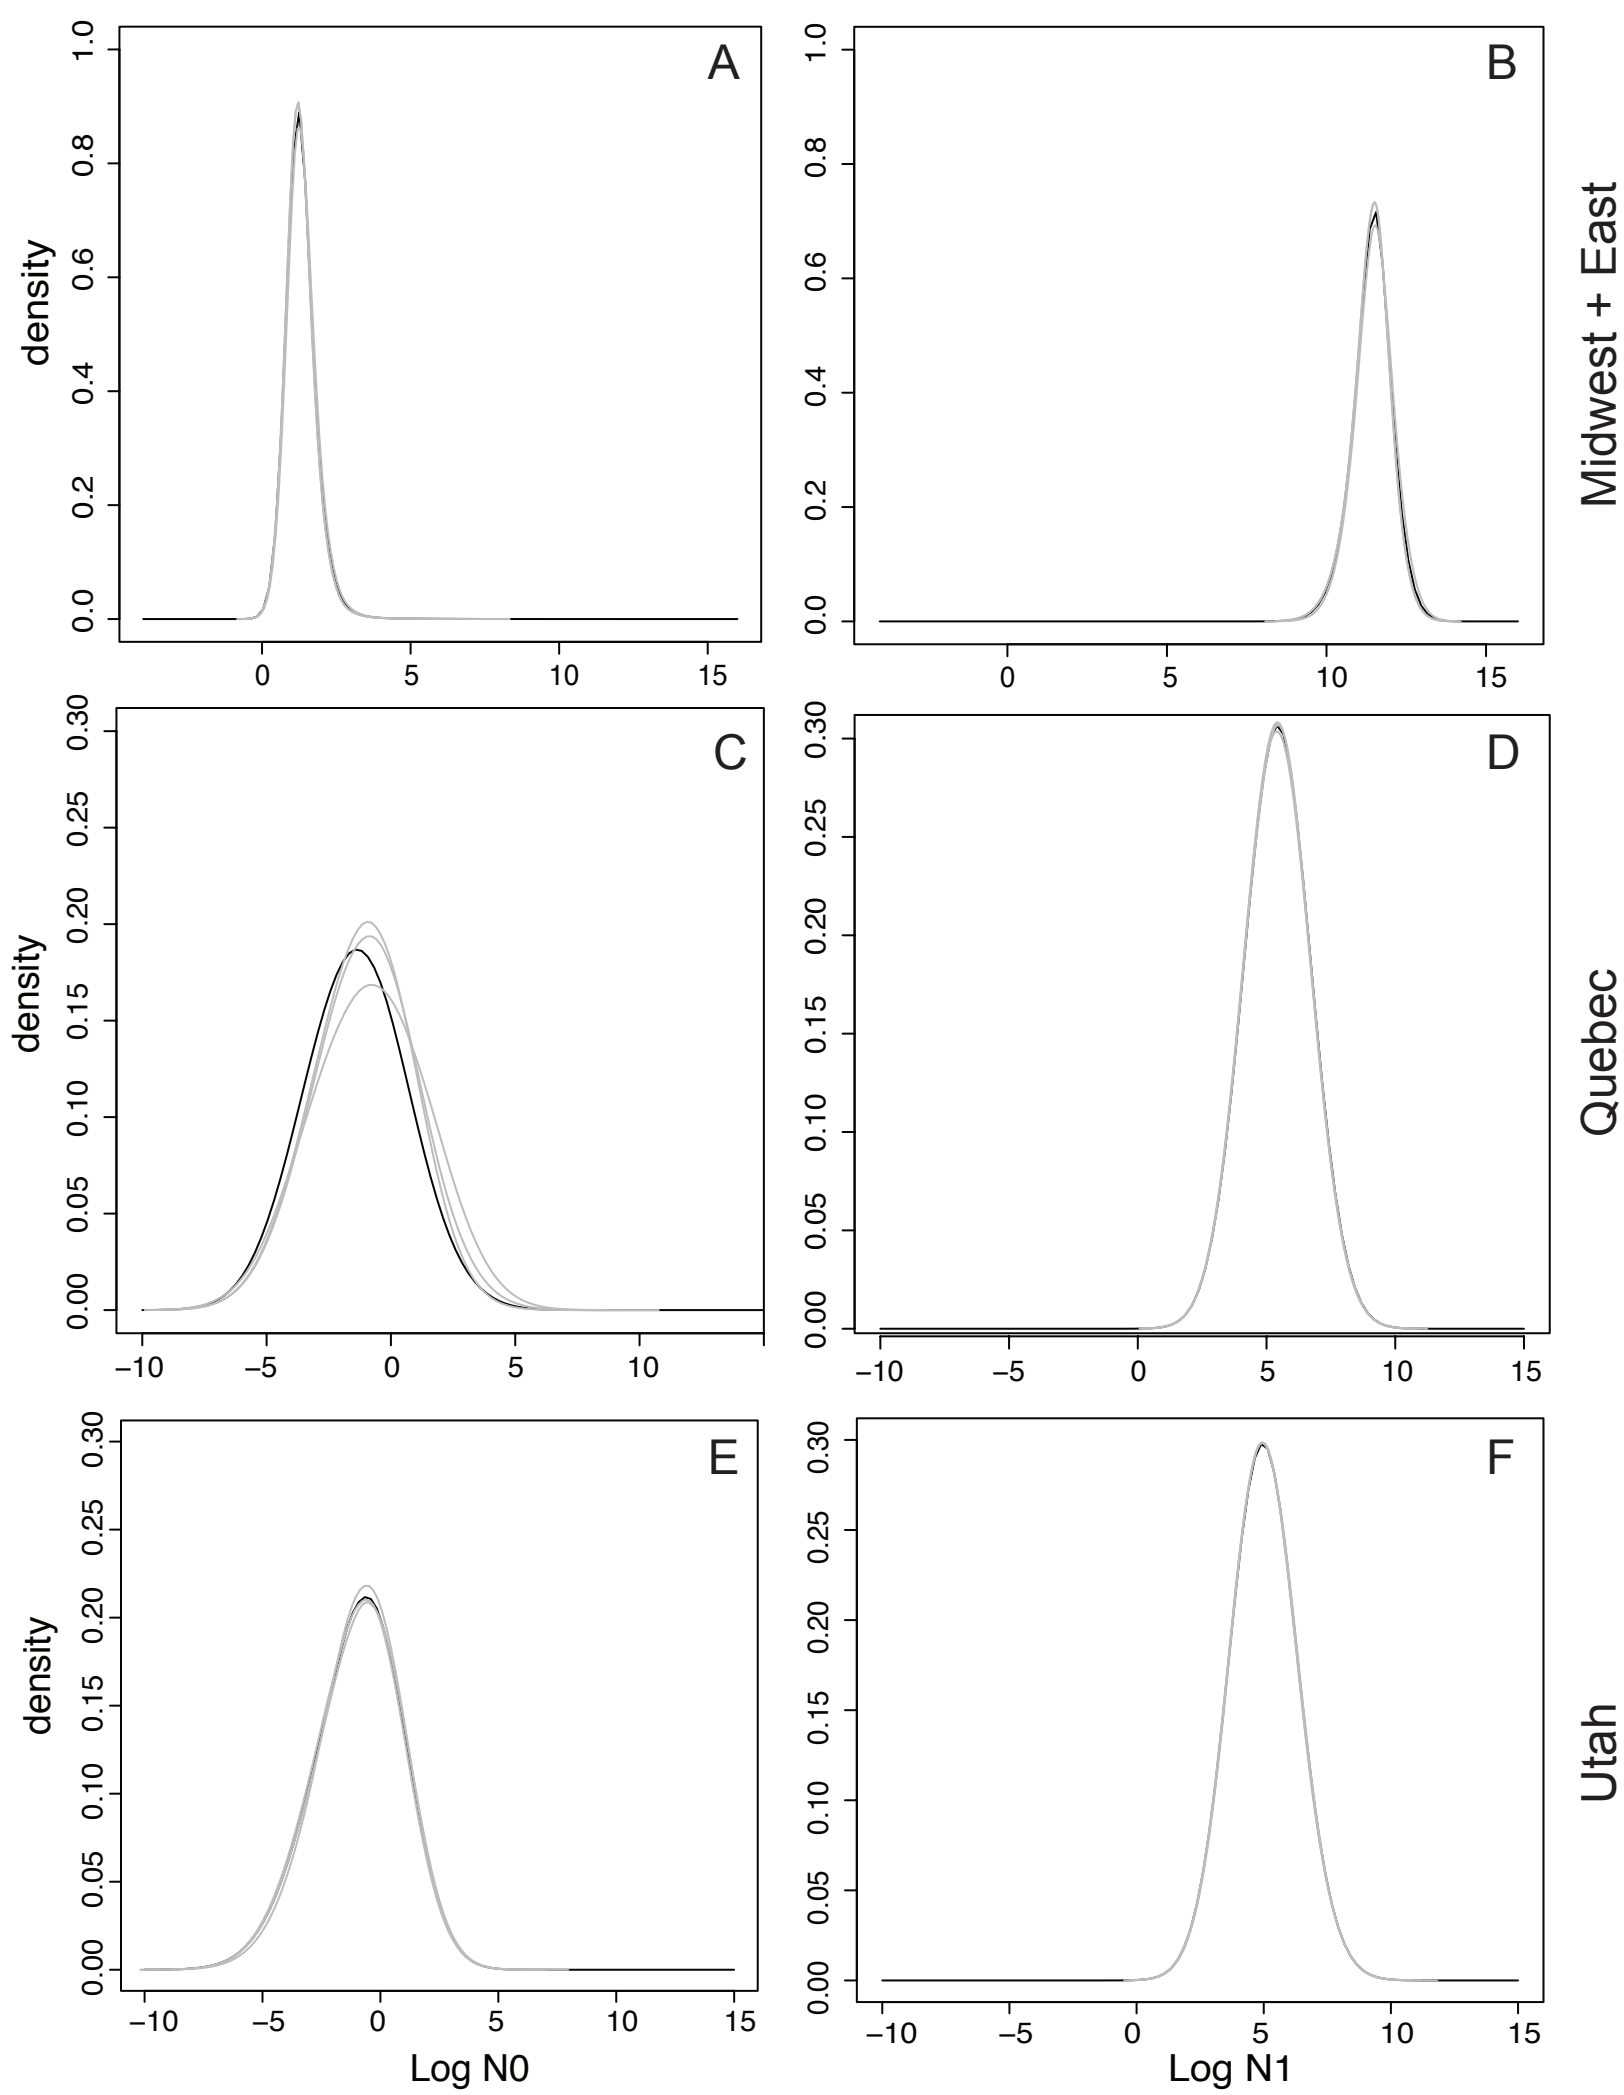

Supplement: rspb20160443supp4.pdf [file rspb20160443supp4.pdf]
